# Supplementary material for: Exclusive detection of ethylene using metal oxide chemiresistors with a Pd–V2O5–TiO2 yolk–shell catalytic overlayer via heterogeneous Wacker oxidation
Source: Royal Society of Chemistry journal article supplement (doi:10.1039/d2ta08425b), 2022-12-07
Supplement: d2ta08425b1.pdf [file d2ta08425b1.pdf]

## SUPPLEMENTARY INFORMATION

**Exclusive detection of ethylene using metal oxide chemiresistors  
with a Pd–V<sub>2</sub>O<sub>5</sub>–TiO<sub>2</sub> yolk-shell catalytic overlayer  
via heterogeneous Wacker oxidation**

Young Kook Moon<sup>‡ a</sup>, Ju Hyeong Kim<sup>‡ a</sup>, Seong-Yong Jeong<sup>a,b</sup>, Soo Min Lee<sup>a</sup>, Seon Ju Park<sup>a</sup>, Tae Hyun Kim<sup>a</sup>, Jong-Heun Lee<sup>a</sup>, and Yun Chan Kang<sup>\* a</sup>

<sup>a</sup>*Department of Materials Science and Engineering, Korea University, Anam-Dong, Seongbuk-Gu, Seoul 136-713, Republic of Korea, E-mail: yckang@korea.ac.kr; Fax: (+82) 2-928-3584*

<sup>b</sup>*Department of Nanoengineering, University of California, San Diego, 9500 Gilman Drive, La Jolla, CA 92122, USA*

\* Corresponding author. E-mail: yckang@korea.ac.kr (Yun Chan Kang)

‡ These authors contributed equally to this work.

## Supplementary Materials and Methods

### Material characterization

High-resolution scanning electron microscopy (HR-SEM; SU-70, Hitachi Co. Ltd., Japan) was used to observe the morphologies and microstructures of the materials and sensor films. The high-resolution transmission electron microscopy (HR-TEM) and elemental mapping images of the  $\text{In}_2\text{O}_3$  and  $\text{Pd-V}_2\text{O}_5\text{-TiO}_2$  powders were obtained using Cs-scanning transmission electron microscopy (Cs-STEM, JEM-ARM200F, JEOL Co. Ltd., Japan). The pore size distribution and specific surface area were measured based on the Brunauer–Emmett–Teller (BET) analysis of nitrogen adsorption isotherms (TriStar 3000, Micromeritics, USA). The phase and crystallinity of all the materials were analyzed by X-ray diffraction (XRD) (D/MAX-2500 V/PC, Rigaku, Japan) with a  $\text{Cu K}\alpha$  radiation source ( $\lambda = 1.5418 \text{ \AA}$ ). The chemical states of Pd and  $\text{V}_2\text{O}_5$  on  $\text{TiO}_2$  were analyzed using X-ray photoelectron spectroscopy (XPS) (X-tool, Ulvac PHI, Japan). The concentrations of Pd and V on the  $\text{TiO}_2$  yolk-shell spheres were determined using an inductively coupled plasma-optical emission spectrometer (ICP-OES, iCAP 6300 SERIES, Thermo Fisher Scientific Inc., USA). The cross-sectional images and composition of the  $2\text{Pd-V}_2\text{O}_5\text{-TiO}_2/\text{In}_2\text{O}_3$  sensor were investigated using a field-emission electron probe microanalysis (FE-EPMA, JXA-8530F, JEOL Co. Ltd., Japan) apparatus. The reducibility of the  $2\text{Pd-V}_2\text{O}_5\text{-TiO}_2$  and  $\text{V}_2\text{O}_5\text{-TiO}_2$  catalysts was examined through temperature-programmed reduction by  $\text{H}_2$  gas ( $\text{H}_2\text{-TPR}$ ) under gradually increasing thermal conditions from room temperature to  $500 \text{ }^\circ\text{C}$ .

### Sensor data acquisition

The sensors were heat-treated at  $500 \text{ }^\circ\text{C}$  for 2 h for thermal stabilization before measurement. The sensors were placed in a specially designed quartz tube (inner volume:  $1.5 \text{ cm}^3$ ). The gas concentrations were controlled by mixing the analyte gas and synthetic air using an automatic gas mixing system, and the gas atmosphere was switched using a four-way valve to ensure a constant flow rate ( $200 \text{ cm}^3 \text{ min}^{-1}$ ). The two-probe direct current (DC) resistance was measured

using an electrometer (6487 picoammeter/voltage source, Keithley, USA) interfaced with a computer. The gas responses ( $R_a/R_g-1$ ,  $R_a$ : resistance in air,  $R_g$ : resistance in gas) to 1 ppm of ethylene, ethanol, trimethylamine (TMA), carbon monoxide (CO), hydrogen sulfide (H<sub>2</sub>S), and hydrogen (H<sub>2</sub>) were measured in the temperature range of 300–400 °C.

### **Catalytic evaluation of Pd–V<sub>2</sub>O<sub>5</sub>–TiO<sub>2</sub>**

The catalytic activity of the Pd–V<sub>2</sub>O<sub>5</sub>–TiO<sub>2</sub> powder was evaluated in a quartz tube reactor (length: 400 mm, inner diameter: 8 mm) kept in a furnace. Afterward, 0.01 g of the 2Pd–V<sub>2</sub>O<sub>5</sub>–TiO<sub>2</sub> powder was loaded onto a quartz wool bed placed in the middle of the quartz tube. The total flow rate of the 1 ppm ethylene (21% O<sub>2</sub>/N<sub>2</sub> balance) was 200 cm<sup>3</sup> min<sup>-1</sup>. The ethylene conversion and by-product gases in the ethylene oxidation were analyzed by online PTR-QMS (PTR-QMS 300, Ionicon Analytik, Austria). The drift tube conditions were fixed (voltage: 600 V, temperature: 80 °C, pressure: 2.3 mbar), and the electric field strength/gas number density (E/N) was 136 Td (1 Td = 10<sup>-17</sup> V cm<sup>2</sup>). The H<sub>3</sub>O<sup>+</sup> ions served as the primary ions, and the catalytic activity tests were carried out at temperatures ranging from 100 to 450 °C.

### **Detection of ethylene generated from banana**

The banana was stored in open air (relative humidity of 50 – 60%) at room temperature (20–25 °C) without any treatment, and the changes in the peel color and the concentration of emitted ethylene were monitored over 7 days. For this, the sensor was located in an acrylic chamber with a fixed volume (inner volume: 30 cm × 30 cm × 15 cm) for 30 min. When the sensor resistance was constant in ambient atmosphere (relative humidity: 50 – 60 %, room temperature), the banana was injected into the chamber and the variation of sensor resistance were measured for 300 sec, subsequently recovered to its original resistance via ejecting the banana from the chamber (operating temperature: 325 °C). The concentration of ethylene in the chamber were concurrently measured by PTR-QMS.

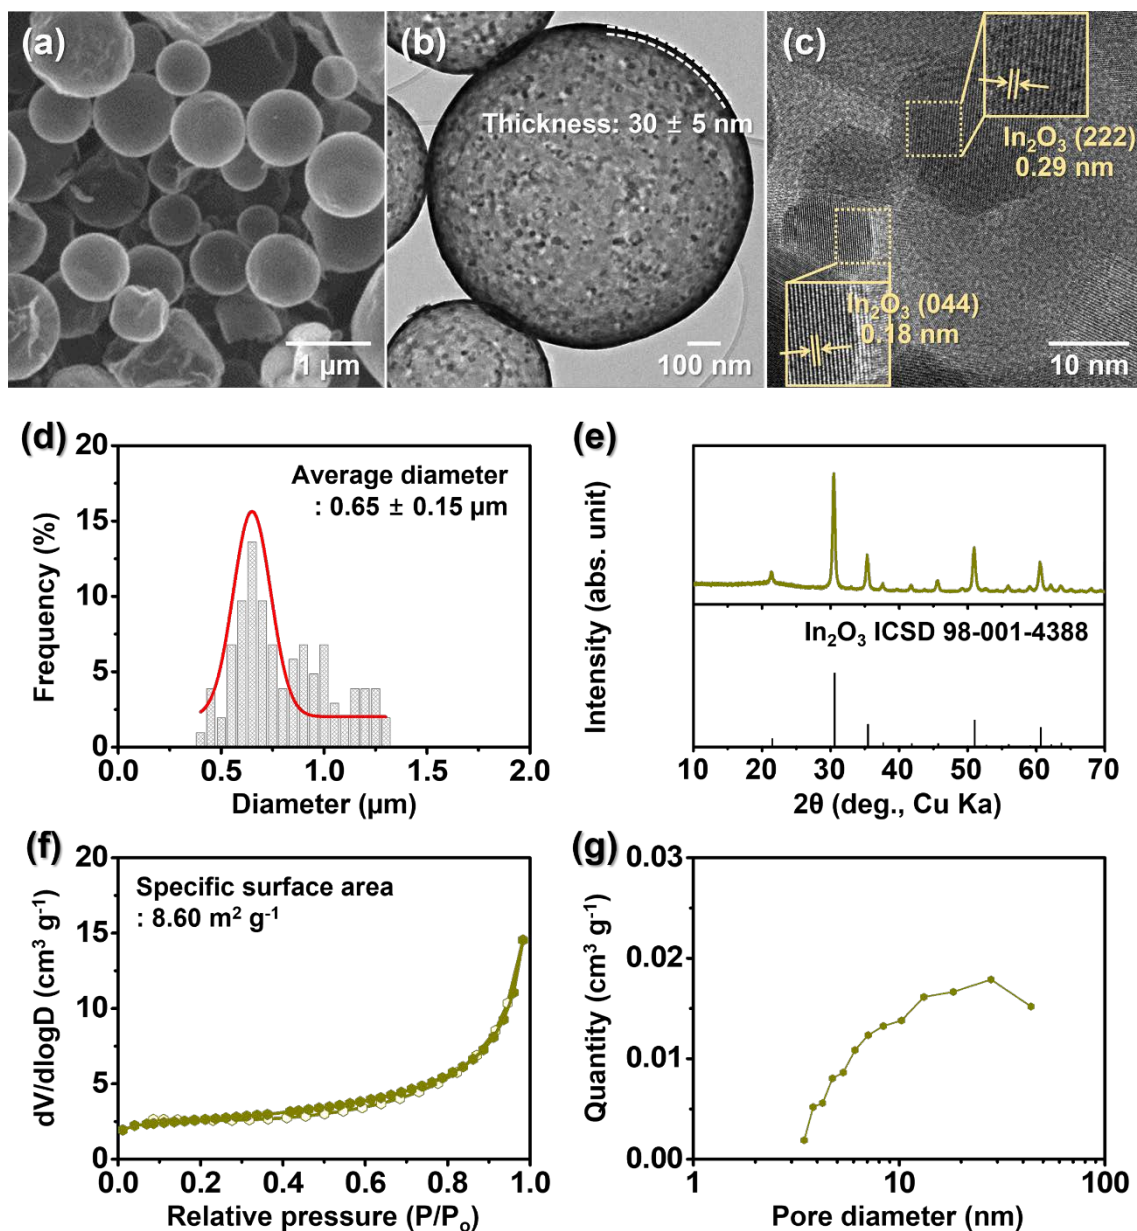

**Fig. S1** (a) SEM image and (b) TEM image, (c) HR-TEM image, (d) size distribution, (e) XRD pattern, (f) N<sub>2</sub> adsorption/desorption isotherm and BET surface area, and (g) BJH pore-size distribution of In<sub>2</sub>O<sub>3</sub> hollow spheres.

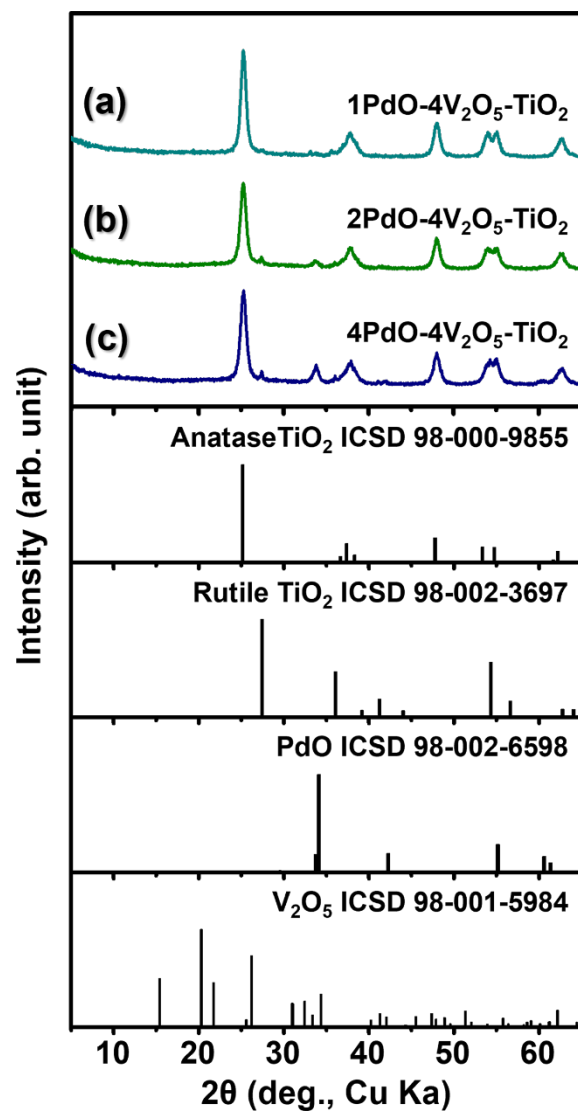

**Fig. S2** XRD pattern of (a) 1Pd-V<sub>2</sub>O<sub>5</sub>-TiO<sub>2</sub>, (b) 2Pd-V<sub>2</sub>O<sub>5</sub>-TiO<sub>2</sub>, and (c) 4Pd-V<sub>2</sub>O<sub>5</sub>-TiO<sub>2</sub> yolk-shell spheres.

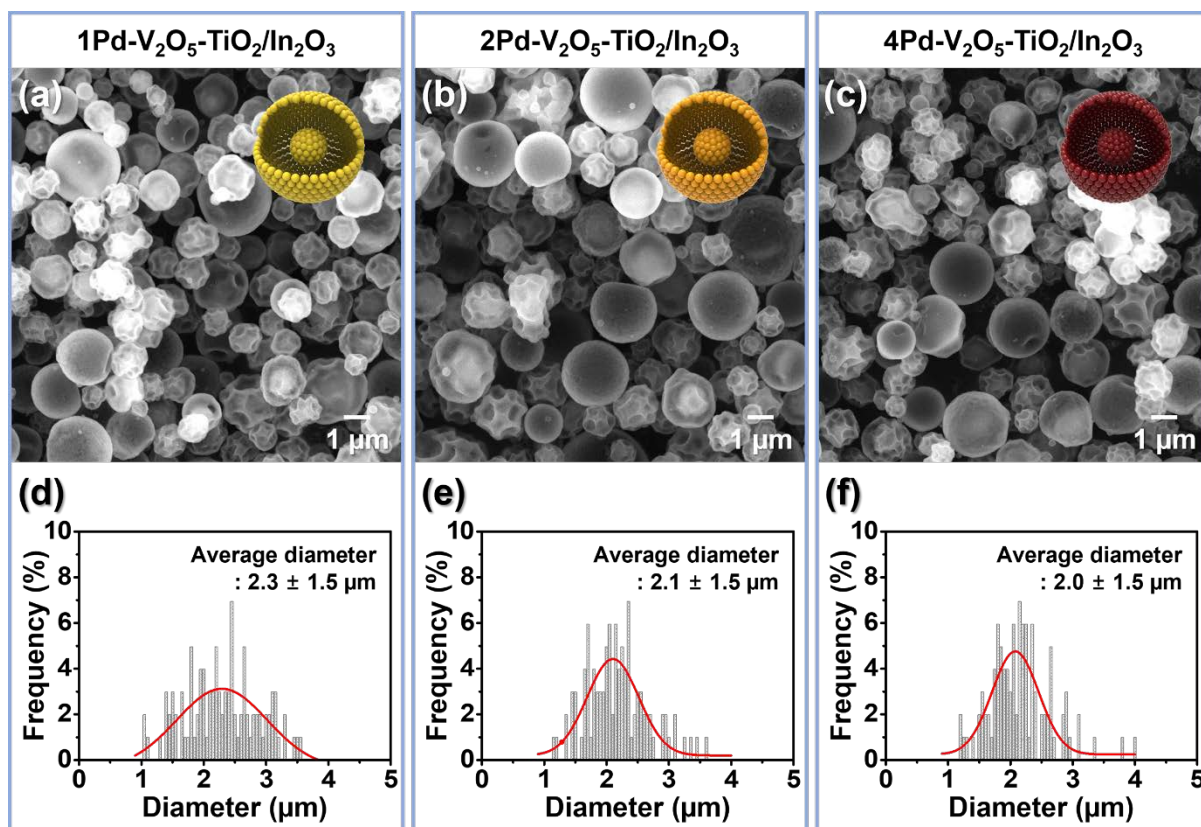

**Fig. S3** (a-c) SEM images and (d-f) size distributions of (a and d) 1Pd-V<sub>2</sub>O<sub>5</sub>-TiO<sub>2</sub>, (b and e) 2Pd-V<sub>2</sub>O<sub>5</sub>-TiO<sub>2</sub>, and (c and f) 4Pd-V<sub>2</sub>O<sub>5</sub>-TiO<sub>2</sub> yolk-shell spheres.

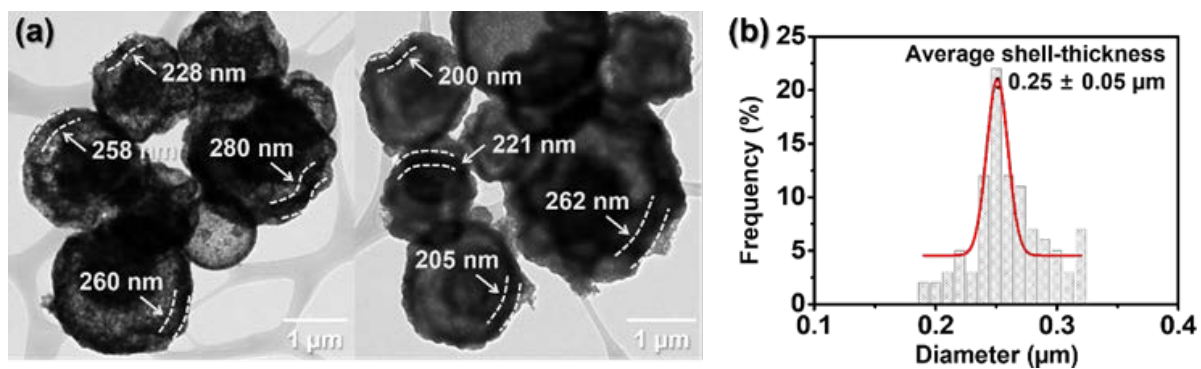

**Fig. S4** (a) TEM images and (b) shell-thickness distribution of 2Pd–V<sub>2</sub>O<sub>5</sub>–TiO<sub>2</sub> yolk-shell spheres.

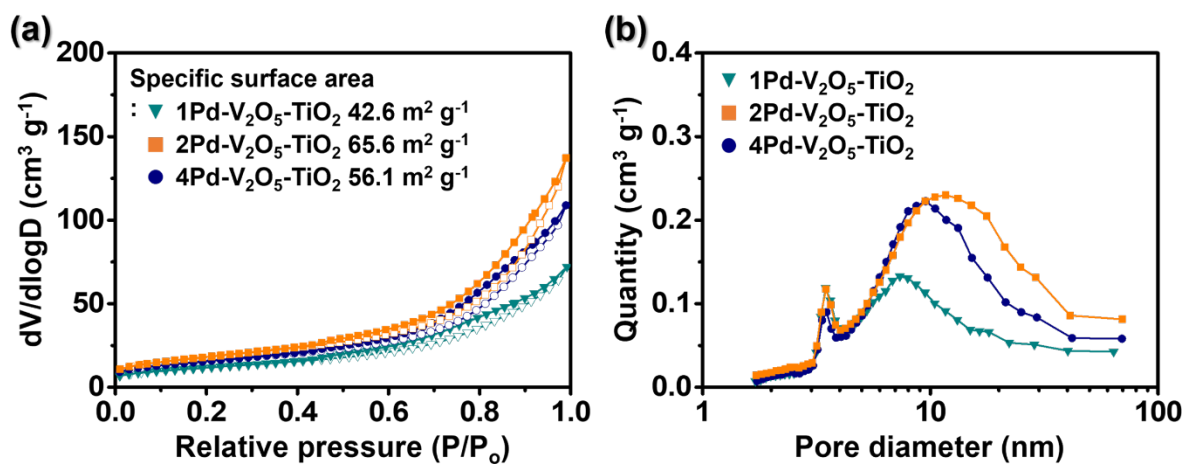

**Fig. S5** (a) N<sub>2</sub> adsorption/desorption isotherms and BET surface areas and (b) BJH pore-size distributions of 1Pd-V<sub>2</sub>O<sub>5</sub>-TiO<sub>2</sub>, 2Pd-V<sub>2</sub>O<sub>5</sub>-TiO<sub>2</sub>, and 4Pd-V<sub>2</sub>O<sub>5</sub>-TiO<sub>2</sub> yolk-shell spheres.



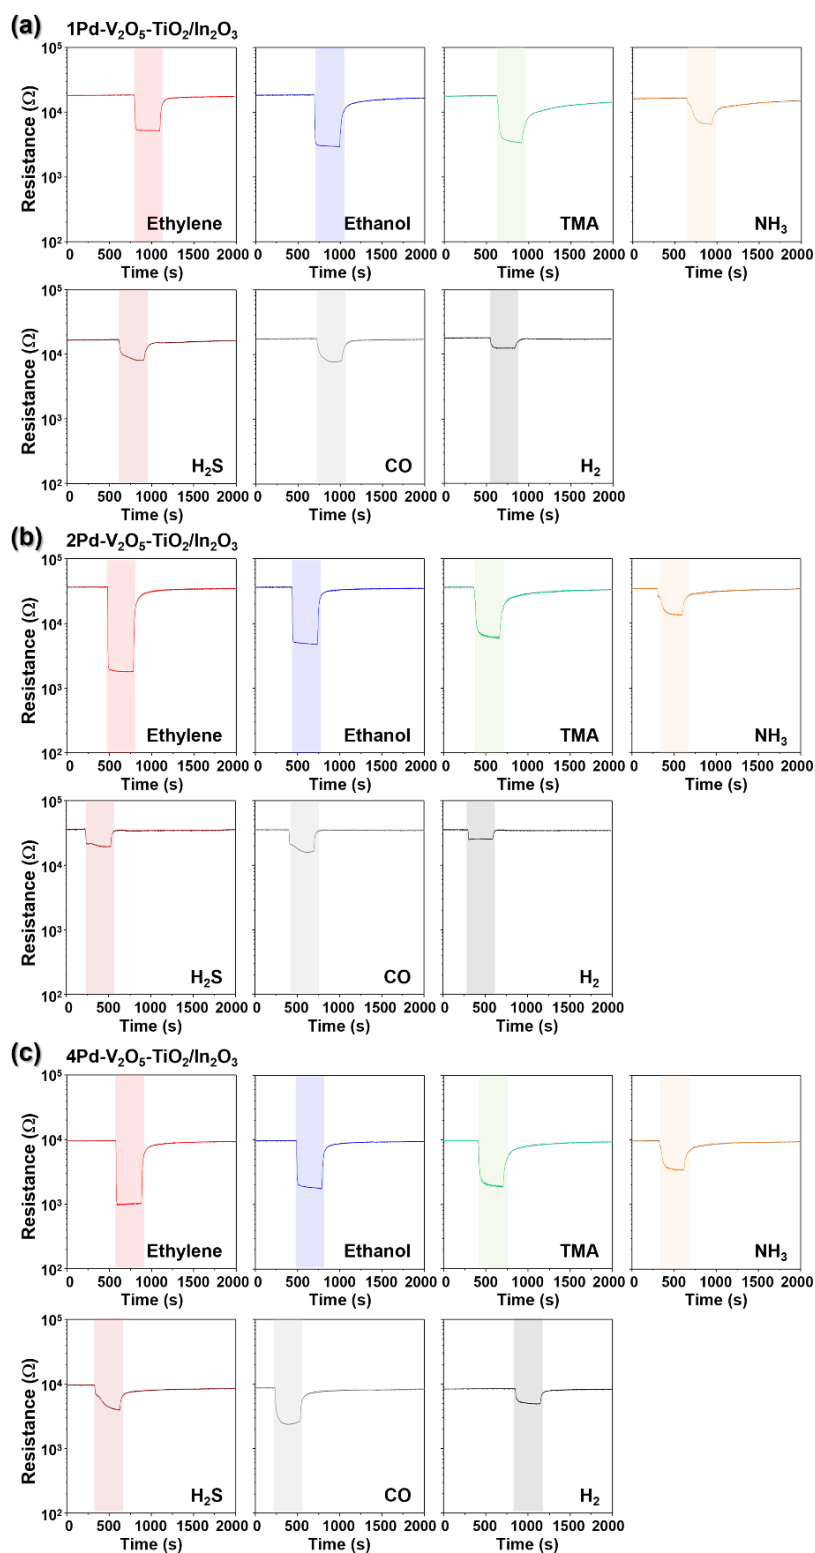

**Fig. S6** Dynamic sensing transients of (a) 1Pd-V<sub>2</sub>O<sub>5</sub>-TiO<sub>2</sub>/In<sub>2</sub>O<sub>3</sub>, (b) 2Pd-V<sub>2</sub>O<sub>5</sub>-TiO<sub>2</sub>/In<sub>2</sub>O<sub>3</sub>, and (c) 4Pd-V<sub>2</sub>O<sub>5</sub>-TiO<sub>2</sub>/In<sub>2</sub>O<sub>3</sub> bilayer sensors to 1 ppm analyte gases at 300 °C.

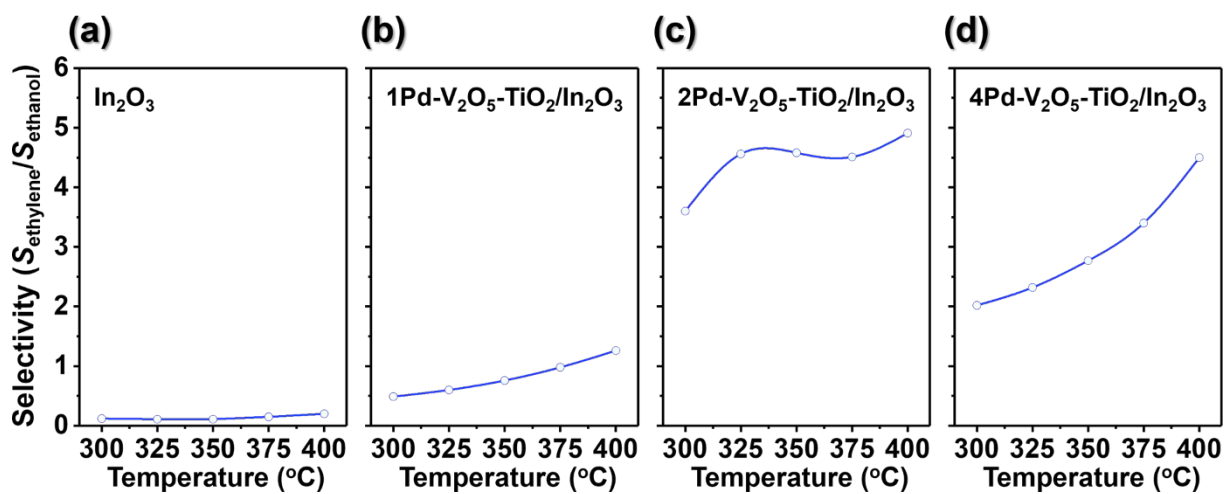

**Fig. S7** Ethylene selectivity of (a)  $\text{In}_2\text{O}_3$ , (b)  $1\text{Pd-V}_2\text{O}_5\text{-TiO}_2/\text{In}_2\text{O}_3$ , (c)  $2\text{Pd-V}_2\text{O}_5\text{-TiO}_2/\text{In}_2\text{O}_3$ , and (d)  $4\text{Pd-V}_2\text{O}_5\text{-TiO}_2/\text{In}_2\text{O}_3$  bilayer sensors in the range of 300–400 °C.

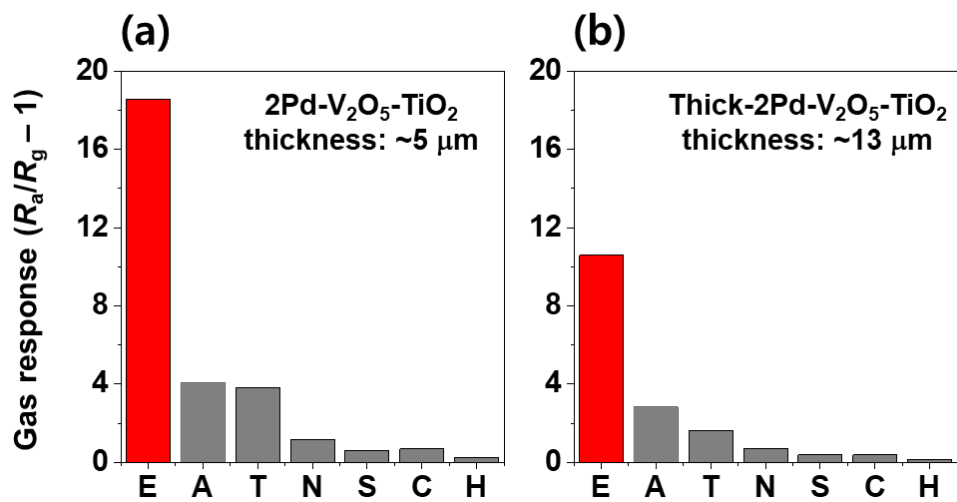

**Fig. S8** Gas sensing characteristics of a) 2Pd-V<sub>2</sub>O<sub>5</sub>-TiO<sub>2</sub>/In<sub>2</sub>O<sub>3</sub> and b) thick-2Pd-V<sub>2</sub>O<sub>5</sub>-TiO<sub>2</sub>/In<sub>2</sub>O<sub>3</sub> sensors to ethylene (E), ethanol (A), trimethylamine (T), ammonia (N), hydrogen sulfide (S), carbon monoxide (C), and hydrogen (H) at 325 °C.

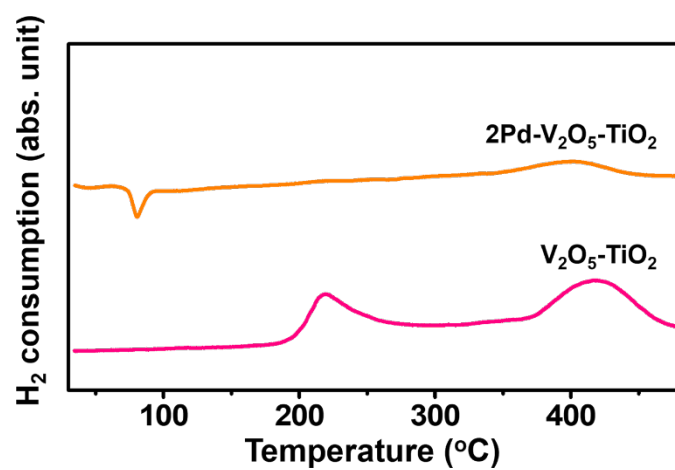

**Fig. S9** H<sub>2</sub>-TPR profiles of 2Pd-V<sub>2</sub>O<sub>5</sub>-TiO<sub>2</sub> and V<sub>2</sub>O<sub>5</sub>-TiO<sub>2</sub> catalysts under gradually increasing thermal conditions from room-temperature to 500 °C.

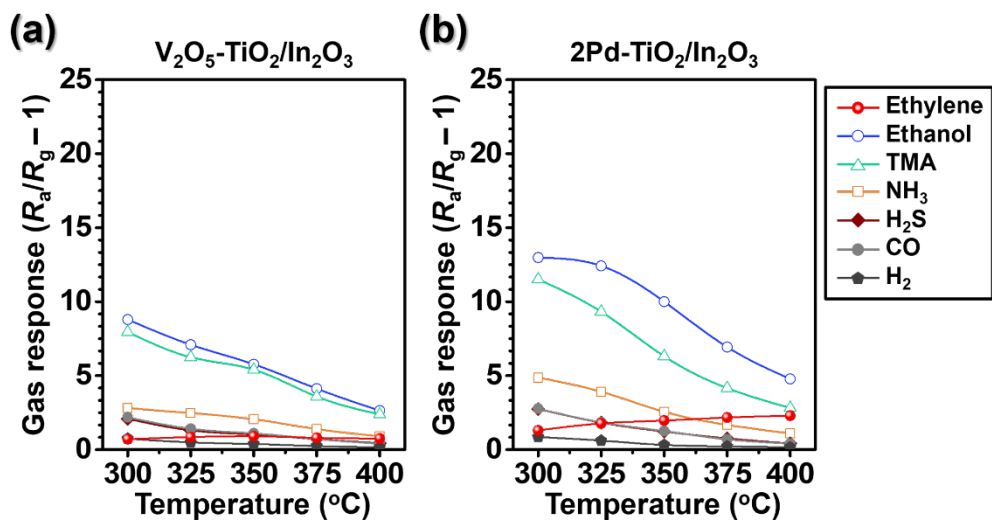

**Fig. S10** Gas sensing characteristics of (a)  $V_2O_5-TiO_2/In_2O_3$  and (b)  $2Pd-TiO_2/In_2O_3$  bilayer sensors to 1 ppm of various gases (ethylene, ethanol, TMA,  $NH_3$ ,  $H_2S$ , CO, and  $H_2$ ) in the range of 300–400 °C.

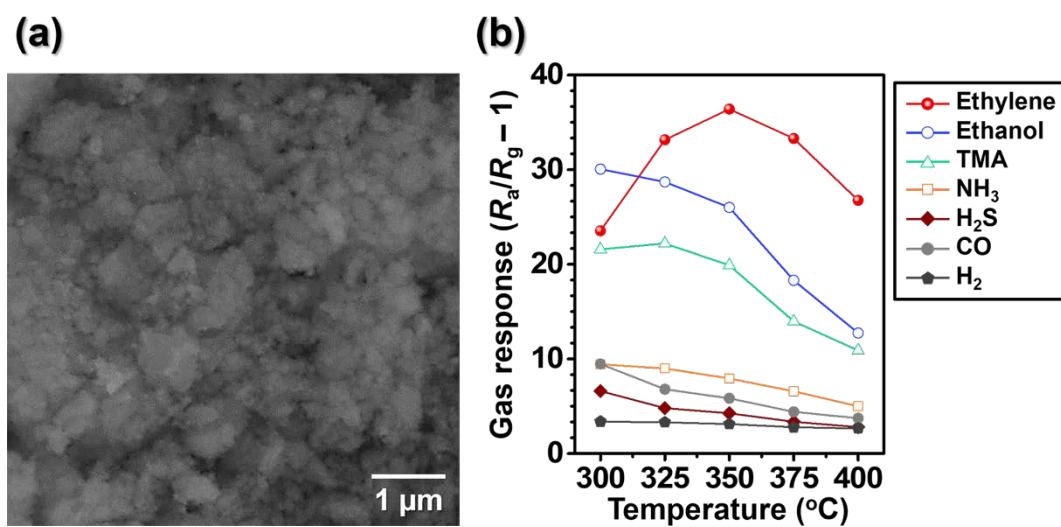

**Fig. S11** (a) SEM image of NP-2Pd-V<sub>2</sub>O<sub>5</sub>-TiO<sub>2</sub> and (b) gas sensing characteristics of NP-2Pd-V<sub>2</sub>O<sub>5</sub>-TiO<sub>2</sub>/In<sub>2</sub>O<sub>3</sub> bilayer sensor to 1 ppm of various gases (ethylene, ethanol, TMA, NH<sub>3</sub>, H<sub>2</sub>S, CO, and H<sub>2</sub>) in the range of 300–400 °C.

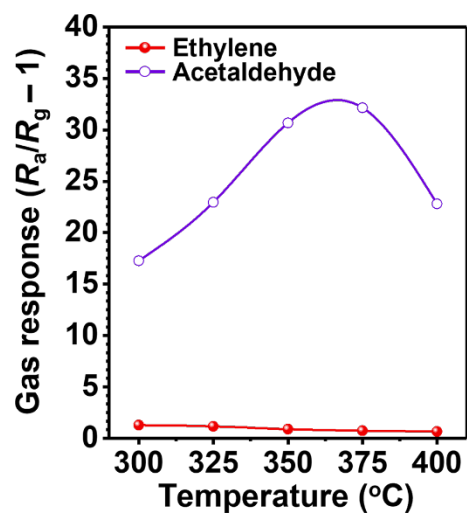

**Fig. S12** Gas sensing characteristics of pure  $\text{In}_2\text{O}_3$  sensor to 1 ppm of ethylene and acetaldehyde from 300–400 °C.

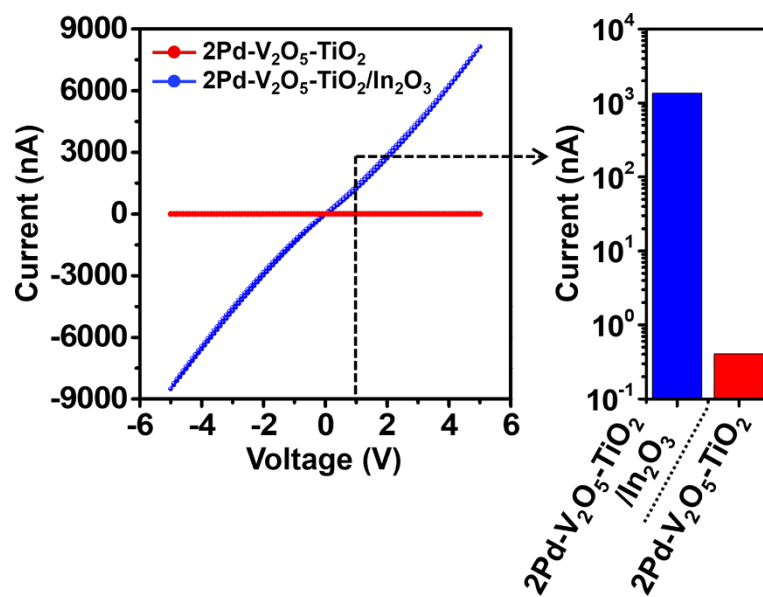

**Fig. S13** I-V curve (left) and the current at 1V (right) of 2Pd-V<sub>2</sub>O<sub>5</sub>-TiO<sub>2</sub> single-layer sensor and 2Pd-V<sub>2</sub>O<sub>5</sub>-TiO<sub>2</sub>/In<sub>2</sub>O<sub>3</sub> bilayer sensor at 325 °C in air atmosphere.



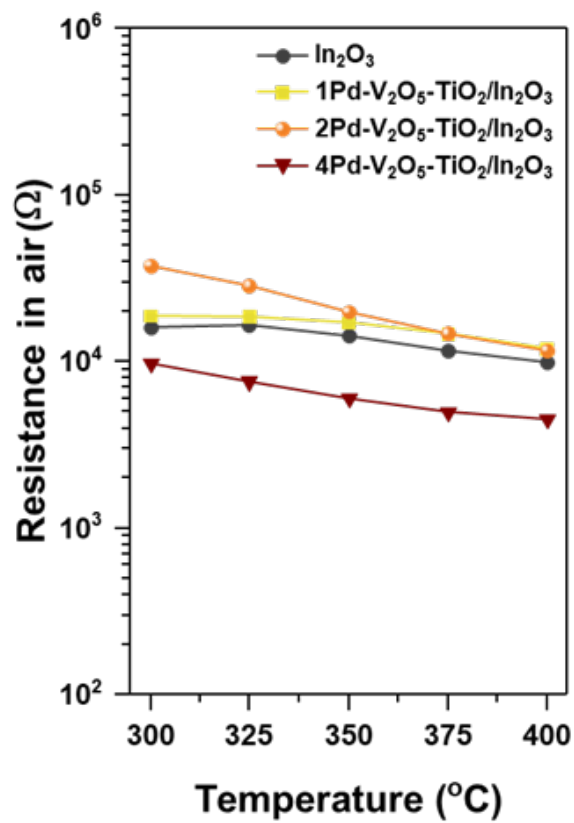

**Fig. S14** Resistance in air of the  $\text{In}_2\text{O}_3$  and  $x\text{Pd-V}_2\text{O}_5\text{-TiO}_2/\text{In}_2\text{O}_3$  ( $x = 1, 2,$  and  $4$  wt%) bilayer sensors in the range of  $300\text{--}400$  °C.
